# Supplementary material for: An Oxalate Transporter Gene, AtOT, Enhances Aluminum Tolerance in Arabidopsis thaliana by Regulating Oxalate Efflux
Source: MDPI journal article supplement (doi:10.3390/ijms24054516), 2023-02-24
Supplement: s1 [file s1]

**Supplementary Table S1** Primers used in the experiments.

| Primer name               | Primer sequence (5'-3')                                                                               | Description                                              |
|---------------------------|-------------------------------------------------------------------------------------------------------|----------------------------------------------------------|
| <i>AtOT</i>               | F: ATGGCGGCTCCTCGG<br>R: TCATTCATATACTCTCTTTCTCT                                                      | For ORF sequence cloning                                 |
| <i>AtOT</i> (pCAMBIA1300) | F: TCATTTGGAGAGAACACGGGGGACTATGGCGGCTCCTCGG<br>R: CCTCGCCCTTGCTCACCATGTCATTCATATACTCTCTTTC            | For subcellular localizaton                              |
| <i>AtOT</i> (pDR196)      | F: TTGGGTACCGGGCCCCCCTCGAGGATGGCGGCTCCTCGGAATTT<br>R: CTAGTGGATCCCCCGGGCTGCAGGTCATTCATATACTCTCTTTCTCT | For yeast heterologous expression<br>vector construction |
| <i>FpOAR</i> (pDR196)     | F: GGTACCGGGCCCCCCTCGAGGATGACCGACCTGCATCGAAG<br>R: CTAGTGGATCCCCCGGGCTGCAGGTCAGAGAAGATCTTCTTGCC       |                                                          |
| q- <i>AtOT</i>            | F: GGC GGCTCCTCGGAAT<br>R: GGCAGGCATGGTGAGGT                                                          | For qRT-PCR                                              |
| q- <i>AtActin2</i>        | F: TGCCAATCTACGAGGGTTTC<br>R: TTCTCGATGGAAGAGCTGGT                                                    |                                                          |
| <i>atot</i>               | LP: ATGTTAAGTTCTTCAGTTTC<br>RP: TCAGAATCACCCATATTTGGTCAAA<br>LBb1.3: ATTTTGCCGATTTTCGGAAC             | For homozygous identification                            |

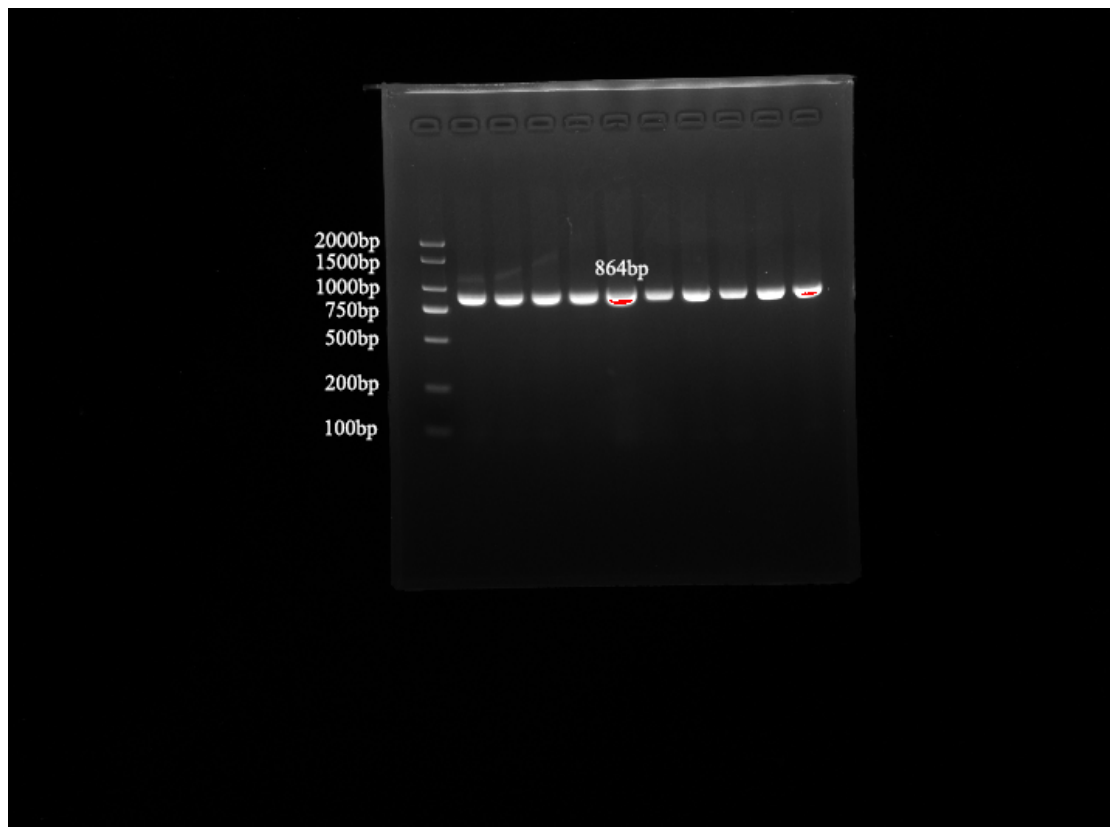

**Supplementary Figure S1.** The PCR amplification products of the ORF sequences of

A

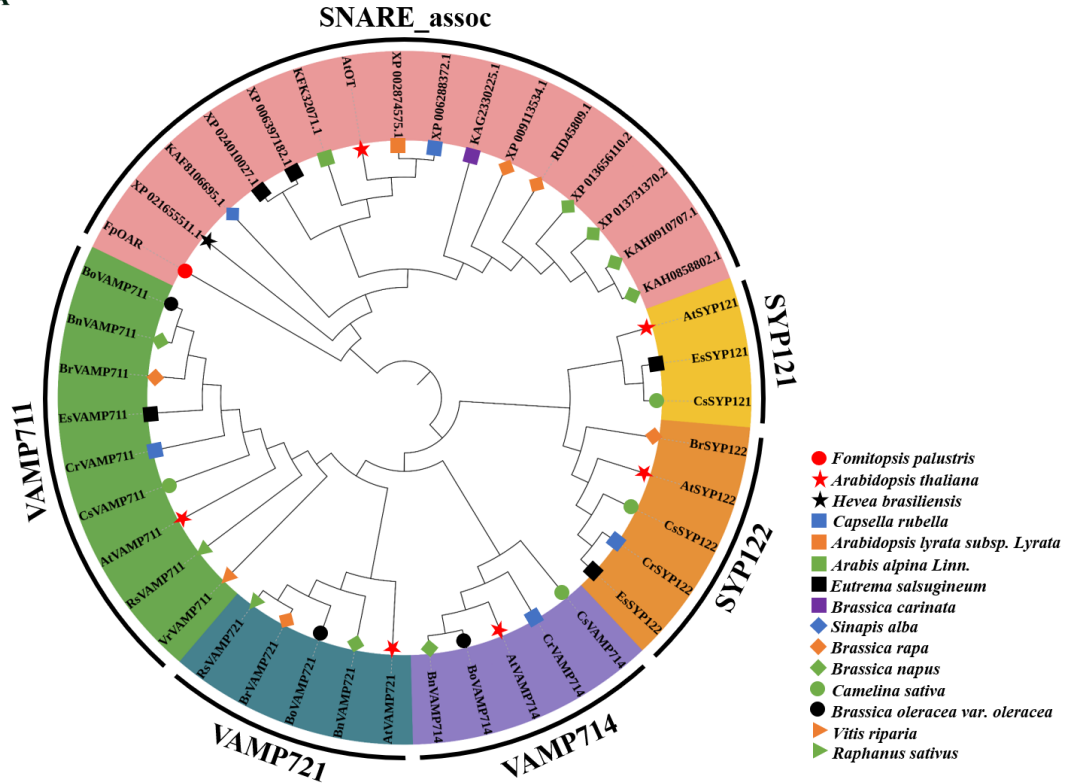

B

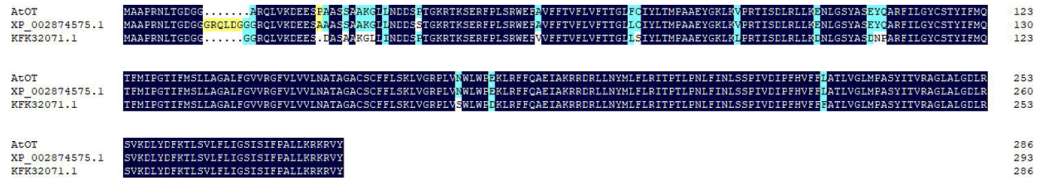

**Supplementary Figure S2.** Phylogenetic analysis of FpOAR, AtOT and SNARE protein members in other plants (A) and multiple sequence alignment of AtOT, XP\_002874575.1 and KFK32071.1 (B).
